# Supplementary material for: Long-read sequence analysis of MMEJ-mediated CRISPR genome editing reveals complex on-target vector insertions that may escape standard PCR-based quality control
Source: PubMed Central journal article supplement (PMC10356751; doi:10.1038/s41598-023-38397-y), 2023-07-19
Supplement: 41598_2023_38397_MOESM1_ESM.pdf [file 41598_2023_38397_MOESM1_ESM.pdf]

## Supplementary Information

### **Long-read sequence analysis of MMEJ-mediated CRISPR genome editing reveals complex on-target vector insertions that may escape standard PCR-based quality control**

Yuki Higashitani and Kyoji Horie

Supplementary Figure 1. Nucleotide sequence of the targeting vector pKlf2-cKO-PITCh.

Supplementary Figure 2. Consensus sequence of Clone 37 obtained using Flye-assembler.

Supplementary Figure 3. Annotation of consensus sequences obtained by de novo assembly of long-read sequencing data and confirmation of assembly fidelity by Sanger direct sequencing.

Supplementary Figure 4. The original gel images of Figure 2B.

Supplementary Figure 5. The original gel images of Figure 2C.

Supplementary Figure 6. The original gel image of Figure 5B.

Supplementary Figure 7. The original gel images of Figure 6B.

Supplementary Table 1. Sequences of the oligonucleotides used in this study.

## Supplementary Figure 1. Nucleotide sequence of the targeting vector pKlf2-cKO-PITCh.

1 TCGCGCGTTT CGGTGATGAC GGTGAAAACC TCTGACACAT GCAGCTCCCG GAGACGGTCA CAGCTTGTCT GTAAGCGGAT GCCGGGAGCA GACAAGCCCC

101 TCAGGGCGCG TCAGCGGGTG TTGGCGGGTG TCGGGGCTGG CTTAACTATG CCGCATCAGA GCAGATTGTA CTGAGAGTGC ACCATATGCG GTGTGAAATA

201 CCGCACAGAT GCGTAAGGAG AAAATACCGC ATCAGGCGCC ATTCGCCATT CAGGCTGCGC AACTGTTGGG AAGGGCGATC GGTGCGGGCC TCTTCGCTAT

301 TACGCCAGCT GGCAGAAAGG GGATGTGCTG CAAGGCGATT AAGTTGGGTA ACGCCAGGTT TTTCCAGTC ACGACGTTGT AAAACGACGG CCAGTGAATT

401 CGAGCTCGGT ACCTCGCGAA TGCATCTAGA TGCATCGTAC GCGTACGTGT TTGGCCAGTA CTGGAGATGA CAAGGTCCAG GGTGCTGACC GCCTATAACT

gRNA-PITCh 5' microhomology

501 TCGTATAGCA TACATTATAC GAAGTTATCA GGGAGTTAGA CTTCAGGCTG TGGACAGGA GGTGGGTGCA GGGACTGAGG ACACGCGCGC TGAAGGGATG

loxP

601 CCGTGCACCG GGTGCAGATC TTGAGGGCCT AGTTGTTAGA CTTTGGGGTG CAGGGTAGCA GGAGGCACCC CCACTCACGT CCCGCGCCCT GTCTCTGCA

701 GCGCTGGCCG CGAAATGAAC CCGAGGCGGG CCGCACGGAT GAGGACCTAA ACAACGTGTT GGACTTCATC CTCTCCATGG GATTGGACGG TCTGGGCGCC

Exon 2  
→

801 GAAAATCCTC CCGAGCCCCC GCGCGAGCCC CCGCGCCTG CCTTCTACTA CCCGAGCGG GGTGCTCCGC CGCCCTACAG CATCCCCGCG GCCAGCCTGG

901 GAACAGAGCT GCTGCGCCCC GACCTGGACC CGCCTCAGG GCGGGCTCTG CACGGCCGCT TCCTCCTCGC GCCTCCCCGG CGGCTAGTGA AGGCCGAGCC

1001 CCCCAGGTG GACGGCGCG GCTACGGCTG CGCTCCGGC CTGGCCACG GACCGCGCG GCTGAAGCTC GAGGGCGCCC CAGGAGCGAC AGGTGCATGC

1101 ATGCGGGGTC CCGCGGGCG CCCCCGCGG CCCCAGGACA CGCCGCCGCT CAGCCCCGAC GGCCCCCTGC GCATCCCGGC GTCCGGTCCC CGCAACCGGT

1201 TCCC GCCCGC CTTCGGTCCC GGCCCCAGCT TCGGCGGTCC CGGCCCGCG TTGCACTACG GGCTCCTCCG GCCTGGCGCC TTCGGTCTTT TCGAGGACGC

1301 GCGGCGAGCG GCGGCGGGCG TGGGCTTGGC TCCACCTGCC ACGCGCGGTC TCCTCAGCC GCCCTCGTCC CCGCTGGAGC TGCTGGAGGC CAAGCCAAA

1401 CGCGGCCGCG GTCCTGGCC CCGCAAGCGC GCCGCCACAC ATACTTGCA GCTACACCAAC TCGGCAAGA CCTACACCAA GAGCTCGCAC CTAAGGCGC

1501 ATCTGCGTAC ACACACAGGT GGGCGCCTGG CCTCATTTCC GGGATCTGCG GCAGGGGGAT GGCCGCGAGT TCAGGAACAG GCTAGGTAG ATATCGCGGC

## Supplementary Figure 1 (continued)

1601 CGCTCTAGAA CTCCACCGCA TTAAATGCG GTGGCGGCCG AAGTTCCTAT TCTCTAGAAA GTATAGGAAC TTCGTCGAAG CTAGTGGATC GATCCGAACA  
FRT

1701 AACGACCCAA CACCCGTGCG TTTTATTCTG TCTTTTATT GCCGATCCCC TCAGAAGAAC TCGTCAAGAA GCGGATAGAA GCGGATGCGC TCGAATCGG  
pA neo

1801 GAGCGGCGAT ACCGTAAAGC ACGAGGAAGC GGTGAGCCCA TTCGCCGCCA AGCTCTTCAG CAATATCAGC GGTAGCCAAC GCTATGTCCT GATAGCGGTC

1901 CGCCACACCC AGCCGGCCAC AGTCGATGAA TCCAGAAAAG CGCCATTTT CCACCATGAT ATTCGGCAAG CAGGCATCGC CATGGGTAC GACGAGATCC

2001 TCGCCGTCGG GCATGCGCGC CTGAGCCTG GCGAACAGTT CGGCTGGCGC GAGCCCTGA TGCTCTTCGT CCAGATCATC CTGATCGACA AGACCGGCTT

2101 CCATCCGAGT ACGTCTGCGC TCGATGCGAT GTTTCGCTTG GTGGTCGAAT GGCAGGTAG CCGGATCAAG CGTATGCAGC CGCCGATTG CATCAGCCAT

2201 GATGGATACT TTCTCGGAGC GAGCAAGGTG AGATGACAGG AGATCCTGCC CCGGCACTTC GCCCAATAGC AGCCAGTCCC TTCCGCTTC AGTGACAACG

2301 TCGAGCACAG CTGCGCAAGG AACGCCGTC GTGGCCAGCC ACGATAGCCG CGCTGCCTCG TCCTGCAGTT CATTCAGGC ACCGGACAGG TCGGTCTTGA

2401 CAAAAAGAAC CGGGCGCCCC TCGCTGACA GCCGGAACAC GCGGCATCA GAGCAGCCGA TTGTCTGTTG TGCCAGTCA TAGCCGAATA GCCTCTCCAC

2501 CCAAGCGGCC GGAGAACCTG CGTGCAATCC ATCTTGTTC AATGGCCGATC CCATATTGGC TGCAGGTCGA AAGGCCCGGA GATGAGGAAG AGGAGAACAG  
PGK promoter

2601 CGCGGCAGAC GTGCGCTTTT GAAGCGTGA GAATGCCGGG CCTCCGAGG ACCTTCGGGC GCCCGCCCCG CCCCTGAGCC CGCCCTGAG CCCGCCCCG

2701 GACCCACCCC TTCCAGCCT CTGAGCCAG AAAGCGAAGG AGCAAAGCTG CTATTGGCCG CTGCCCCAAA GGCCTACCCG CTTCATTGC TCAGCGGTGC

2801 TGTCATCTG CACGAGACTA GTGAGACGTG CTACTTCCAT TTGTACGTC CTGCACGACG CGAGCTGCGG GCGGGGGGG AACTTCCTGA CTAGGGGAGG

2901 AGTAGAAGGT GCGCGAAGG GGCCACAAA GAACGGAGCC GGTGGCGCC TACCGGTGGA TGTGGAATGT GTGCGAGGCC AGAGGCCACT TGTGTAGCGC

3001 CAAGTGCCCA GCGGGGCTGC TAAAGCGCAT GCTCCAGACT GCCTTGGGAA AAGCGCCTCC CCTACCCGGT AGAATTGACC TGCAGGGGCC CTCGAGAAGT

## Supplementary Figure 1 (continued)

3101 TCCTATTCTC TAGAAAATAT AGGAACTTCA TAACTTCGTA TAGCATACAT TATACGAAAT TATGGCGCGC CCAGAGGAAG ACCCTGTCCA TCCTCCAGAA  


---

FRT loxP 3' microhomology

3201 GGGAATGGA TCCAAACACG TACGCGTACG ATGCATCGGA TCCCGGGCCC GTCGACTGCA GAGGCCTGCA TGCAAGCTTG GCGTAATCAT GGTTCATAGCT  


---

gRNA-PITCh

3301 GTTTCCTGTG TGAAATTGTT ATCCGCTCAC AATTCACAC AACATACGAG CCGGAAGCAT AAAGTGTAAG GCCTGGGGTG CCTAATGAGT GAGCTAACTC

3401 ACATTAATTG CGTTGCGCTC ACTGCCCGCT TTCCAGTCGG GAAACCTGTC GTGCCAGCTG CATTAATGAA TCGGCCAACG CGCGGGGAGA GCGCGTTTGC

3501 GTATTGGGCG CTCTCCGCT TCCTCGCTCA CTGACTCGCT GCGCTCGGTC GTTCGGCTGC GCGGAGCGGT ATCAGCTCAC TCAAAGGCGG TAATACGGTT

3601 ATCCACAGAA TCAGGGGATA ACGCAGGAAA GAACATGTGA GCAAAGGCC AGCAAAGGC CAGGAACCGT AAAAAGGCCG CGTTGCTGGC GTTTTTCCAT

3701 AGGCTCCGCC CCCCTGACGA GCATCACAAA AATCGACGCT CAAGTCAGAG GTGGCGAAAC CCGACAGGAC TATAAAGATA CCAGGCGTTC CCCCTGGAA

3801 GCTCCCTCGT GCGCTCTCCT GTTCCGACCC TGCCGCTTAC CGGATACCTG TCCGCTTTC TCCCTTCGGG AAGCGTGGCG CTTTCTCATA GCTCACGCTG

3901 TAGGTATCTC AGTTCGGTGT AGGTCGTTCG CTCCAAGCTG GGCTGTGTGC ACGAACCCCC CGTTCAGCCC GACCGTGCGG CTTTATCCGG TAACTATCGT

4001 CTTGAGTCCA ACCCGGTAAG ACACGACTTA TCGCCACTGG CAGCAGCCAC TGGTAACAGG ATTAGCAGAG CGAGGTATGT AGCGGTGCT ACAGAGTTCT

4101 TGAAGTGGTG GCCTAACTAC GGCTACACTA GAAGAACAGT ATTTGGTATC TCGCTCTGTC TGAAGCCAGT TACCTTCGGA AAAAGAGTTG GTAGCTCTTG

4201 ATCCGGCAAA CAAACCACCG CTGGTAGCGG TGGTTTTTTT GTTTGCAAGC AGCAGATTAC GCGCAGAAA AAAGGATCTC AAGAAGATCC TTTGATCTTT

4301 TCTACGGGGT CTGACGCTCA GTGGAACGAA AACTCACGTT AAGGGATTTT GGTATGAGA TTATCAAAA GGATCTTAC CTAGATCCTT TTAATTAATA

4401 AATGAAGTTT TAAATCAATC TAAAGTATAT ATGAGTAAAC TTGGTCTGAC AGTTACCAAT GCTTAATCAG TGAGGCACCT ATCTCAGCGA TCTGTCTATT  


---

Amp  
←

4501 TCGTTCATCC ATAGTTGCTT GACTCCCGT CGTGTAGATA ACTACGATAC GGGAGGGCTT ACCATCTGGC CCCAGTGCTG CAATGATACC GCGAGACCCA  


---

4601 CGCTCACCGG CTCCAGATTT ATCAGCAATA AACAGCCAG CCGGAAGGCC CGAGCGCAGA AGTGGTCCTG CAACTTTATC CGCCTCCATC CAGTCTATTA  


---

4701 ATGTTGCCG GGAAGCTAGA GTAAGTAGTT CGCCAGTTAA TAGTTTGGC AACGTTGTTG CCATTGCTAC AGGCATCGTG GTGTCACGCT CGTCGTTTGG  


---

4801 TATGGCTTCA TTCAGCTCCG GTTCCCAACG ATCAAGCGGA GTTACATGAT CCCCATGTTT GTGCAAAAAA GCGGTTAGCT CCTTCGGTCC TCCGATCGTT  


---

## Supplementary Figure 1 (continued)

4901 GTCAGAAGTA AGTTGGCCGC AGTGTATCA CTCATGGTTA TGGCAGCACT GCATAATTCT CTTACTGTCA TGCCATCCGT AAGATGCTTT TCTGTGACTG

---

5001 GTGAGTACTC AACCAAGTCA TTCTGAGAAT AGTGTATGCG GCGACCGAGT TGCTCTTGCC CGGCGTCAAT ACGGGATAAT ACCGCGCCAC ATAGCAGAAC

---

5101 TTTAAAAGTG CTCATCATTG GAAAACGTTT TTCGGGGCGA AAACCTCAA GGATCTTACC GCTGTTGAGA TCCAGTTCGA TGTAACCCAC TCGTGCACCC

---

5201 AACTGATCTT CAGCATCTTT TACTTTCACC AGCGTTTCTG GGTGAGCAAA AACAGGAAGG CAAAATGCCG CAAAAAAGGG AATAAGGGCG ACACGGAAAT

---

5301 GTTGAATACT CATACTCTTC CTTTTTCAAT ATTATGAAG CATTATCAG GGTATTGTC TCATGAGCGG ATACATATTT GAATGTATTT AGAAAAATAA

---

5401 ACAAATAGGG GTTCCGCGCA CATTTCCTCCG AAAAGTGCCA CCGACGTCT AAGAAACCAT TATTATCATG ACATTAACCT ATAAAAATAG GCGTATCAGG

5501 AGGCCCTTTC GTC

## Supplementary Figure 2. Consensus sequence of Clone 37 obtained using Flye-assembler.

Nanopore long sequences are prone to errors in regions where the same nucleotides are repeated. Differences between the Nanopore sequencing data and the C57BL/6J mouse genome reference sequence are indicated by boxing the nucleotides and showing the corresponding reference sequence. The regions confirmed by Sanger sequencing (Figs. 3B, 3C) are also indicated below.

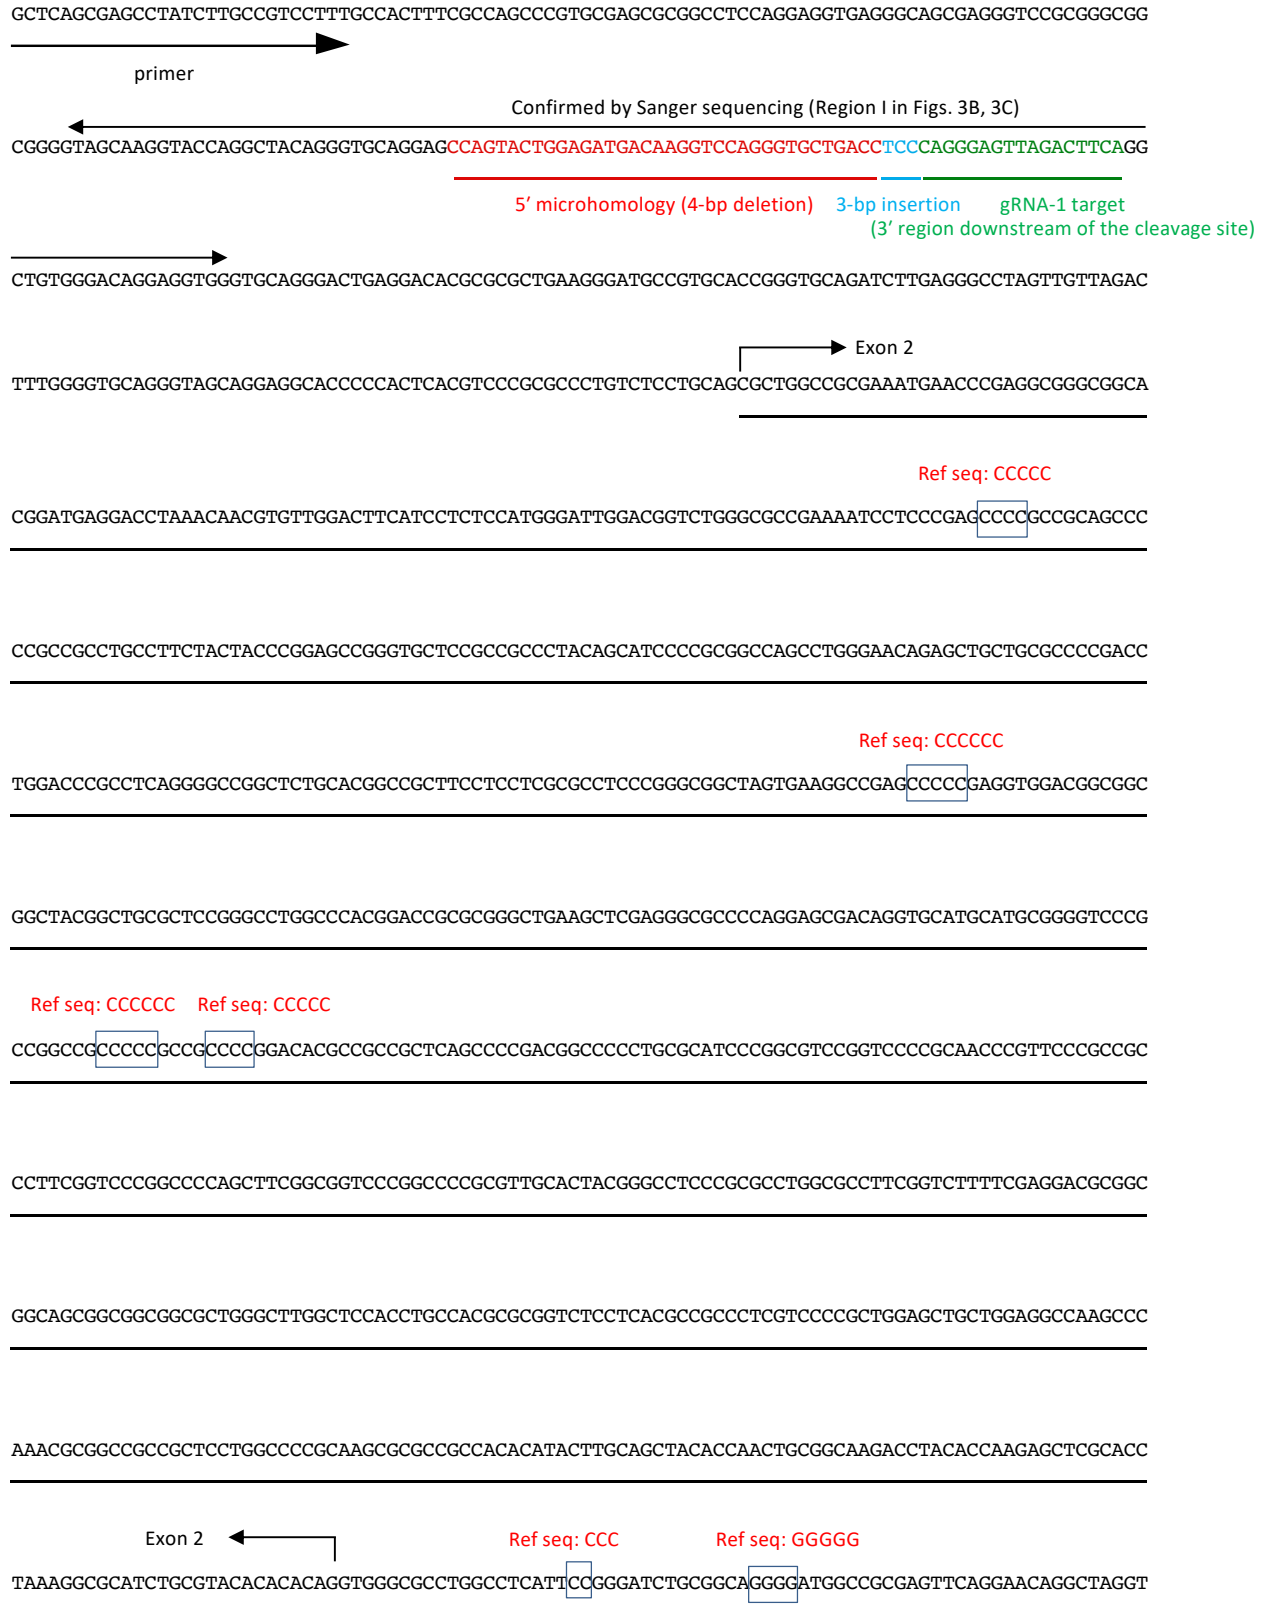

## Supplementary Figure 2 (continued)

TAGATATCGCGCGCGCTCTAGAACTCCACCGCATTTAAATGCGGTGGCGGCCGAAGTTCCTATTCTCTAGAAAAGTATAGGAACTTCGTCTGAAGC

FRT

Ref seq: CCCC

TAGTGGATCGATCCGAACAAACGACCCAACACCCGTGCGTTTTATTCTGTCTTTTATTGCCGATCCCTCAGAAGAACTCGTCAAGAAGGCGAT

PGKneopA (1,222-bp deletion)

AGAAGGCGATGCGCTGCGAATCGGGAGCGGCGATACCGTAAAGCACGAGGAAGCGGTACGCCATTTCGCCCAAGCTCTTCAGCAATATCAGC

GGTAGCCAACGCTATGTCTGATAGCGGTCCGCCACACCAGCCGGCCACAGTCGATGAATCCAGAAAAGCGGCCATTTTCCACCATGATATTC

Confirmed by Sanger sequencing (Region II in Figs. 3B, 3C)

GGCAAGCAGGCATCGCCATGGGTACGACGATGGGTCAAACTGGTGTGGCCAGTACTGGAGATGACAAGTCCAGGGTGTGACCCCTATA

14-bp insertion

5' microhomology

ACTTCGTATAGCATAACATTATACGAAGTTATCAGGGAGTTAGACTTCAGGCTGTGGACAGGAGGTGGGTGCAGGACTGAGGACACGCGCGCT

loxP

Ref seq: T

Ref seq: CCCCC

GAAGGATGCCGTGCACCGGTGCAGATCTTGAGGGCCTAGTTGTTAGACTTTGGGGCGCAGGGTAGCAGGAGGCACCCCACTCACGTCCCGCG

Exon 2

CCCTGTCTCCTGCAGCGCTGGCCGCGAAATGAACCCGAGGCGGGCGGCACGGATGAGGACCTAAACAACGTGTGGACTTCATCCTCTCCATGG

GATTGGACGGTCTGGGCGCCGAAAATCTCCCGAGCCCCCGCCGAGCCCCCGCCGCTGCCCTTCTACTACCCGAGCCGGGTGCTCCGCCGCC

Ref seq: GC

CTACAGCATCCCCGCGGCCAGCCTGGGAACAGAGCTGCTGCAACCCGACCTGGACCCGCCTCAGGGGCGGCTCTGCACGGCCGCTTCTCTCTCG

Ref seq: CCCCC

CGCCCTCCCGGGCGGCTAGTGAAGGCCGAGCCCCGAGGTGGACGGCGGGCTACGGCTGCGCTCCGGGCTGGCCACGGACCGCGGGGCTG

Ref seq: CCCCC

Ref seq: CCCCC

AAGCTCGAGGGCGCCCCAGGAGCGACAGGTGCATGCATGCGGGTCCCGCGGCCGCCCGCCCGCCCGGACACGCCGCGCTCAGCCCCGAC

GGCCCCCTGCGCATCCCGCGTCCGGTCCCGCAACCCGTTCCCGCCGCTTCGGTCCCGGCCAGCTTCGGCGGTCCCGGCCCGCGTTGC

ACTACGGGCTCCCGCGCTGGCGCTTCGGTCTTTTCGAGGACGCGGGCGGAGCGGGCGGGCGTGGGCTGGCTCCACCTGCCACGCGCGG

## Supplementary Figure 2 (continued)

TCTCCTCACGCCGCCCTCGTCCCCGCTGGAGCTGCTGGAGGCCAAGCCAAACGCGGCCGCGCTCCTGGCCCCGAAGCGCGGCCACACAT

---

Exon 2 ←

ACTTGCAGCTACACCAACTGCGGCAAGACCTACACCAAGAGCTCGCACCTAAAGGCGCATCTGCGTACACACACAGGTGGGCGCCTGGCCTCAT

---

Ref seq: CCC

Ref seq: GGGGG

TCCGGGATCTGCGGCAAGGGATGGCCGCGAGTTCAGGAACAGGCTAGGTTAGATATCGCGGCCGCTCTAGAACTCCACCGCATTTAAATGCGGT

GGCGGCCGAAGTTCCTATTCCTCTAGAAAAGTATAGGAACCTCGTCTGAAGCTAGTGGATCGATCCGAACAAACGACCCAACACCCGTGCGTTTTAT

FRT

PGKneopA

Ref seq: CCCC

TCTGTCTTTTTATGCGCATCCCTCAGAAGAACTCGTCAAGAAGGCGATAGAAGGCGATGCGCTGCGAATCGGGAGCGGCGATACCGTAAAGCA

---

CGAGGAAGCGGTACGCCATTCGCCGCCAAGCTCTTCAGCAATATCACGGGTAGCCAACGCTATGTCTGATAGCGGTCCGCCACACCAGCCG

---

GCCACAGTCGATGAATCCAGAAAAGCGGCCATTTCCACCATGATATTCGGCAAGCAGGCATCGCCATGGGTACGACGAGATCTCGCCGTCG

---

GGCATGCGCGCCTTGAGCCTGGCGAACAGTTCGGCTGGCGCGAGCCCTGATGCTCTTCGTCCAGATCATCTGATCGACAAGACCGGCTTCCA

---

TCCGAGTACGTGCTCGCTCGATGCGATGTTTCGCTTGGTGGTCAATGGCAGGTAGCCGGATCAAGCGTATGCAGCCGCCGATTCATCAGC

---

CATGATGGATACTTTCGCGCAGGAGCAAGGTGAGATGACAGGAGATCCTGCCCGGCACTTCGCCCAATAGCAGCCAGTCCCTTCCCGCTTCA

---

GTGACAACGTCGAGCACAGCTGCGCAAGGAACGCCCGTCTGGCCAGCCAGATAGCCGCGCTGCCTCGTCTGCAGTTCATTACAGGGCACCGG

---

Ref seq: AAAAA

ACAGGTCGGTCTTGACAAAAGAACCAGGGCGCCCTGCGCTGACAGCCGGAACACGGCGCATCAGAGCAGCCGATGCTCTGTTGTGCCAGTCA

---

TAGCCGAATAGCCTCTCCACCAAGCGGCCGAGAACCTGCGTGAATCCATCTTGTTCATGGCCGATCCCATATTGGCTGCAGGTCGAAAGG

---

CCCGGAGATGAGGAAGAGGAGAACAGCGCGCAGACGTGCGCTTTTGAAGCGTGCAGAATGCCGGCCTCCGGAGGACCTTCGGGCGCCCGCC

---



## Supplementary Figure 2 (continued)

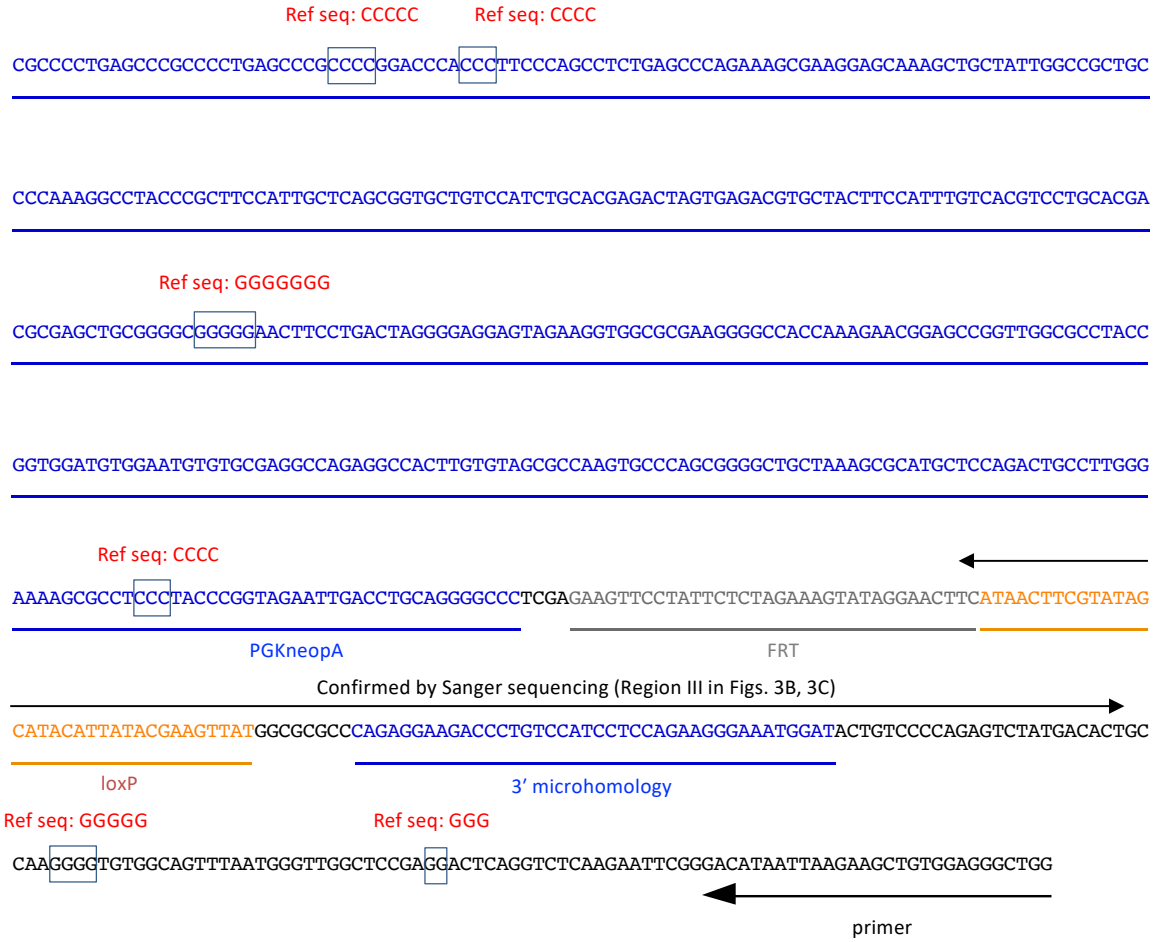

**Supplementary Figure 3. Annotation of consensus sequences obtained by de novo assembly of long-read sequencing data and confirmation of assembly fidelity by Sanger direct sequencing.**

## Clone 6

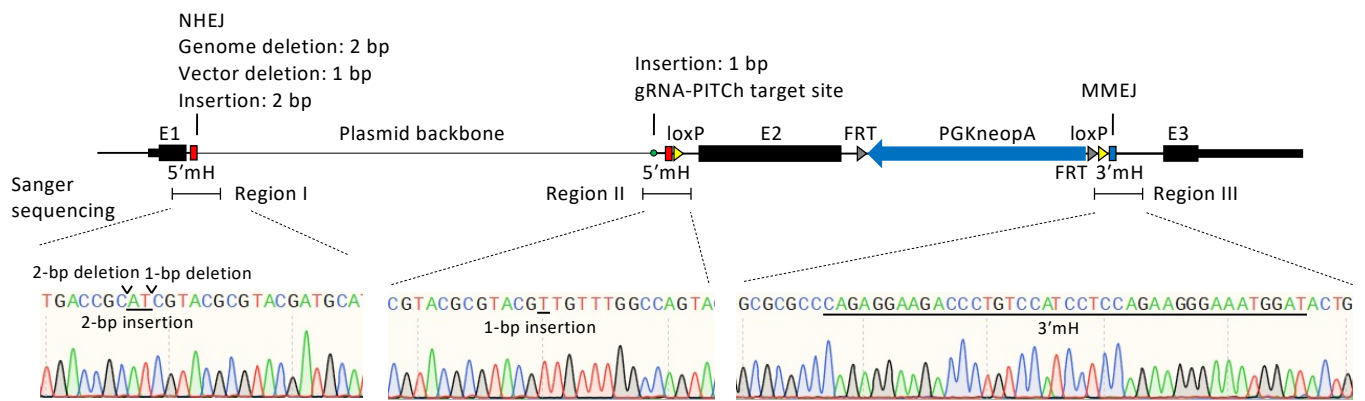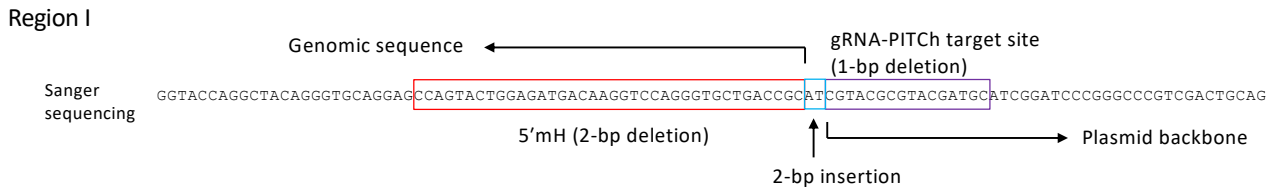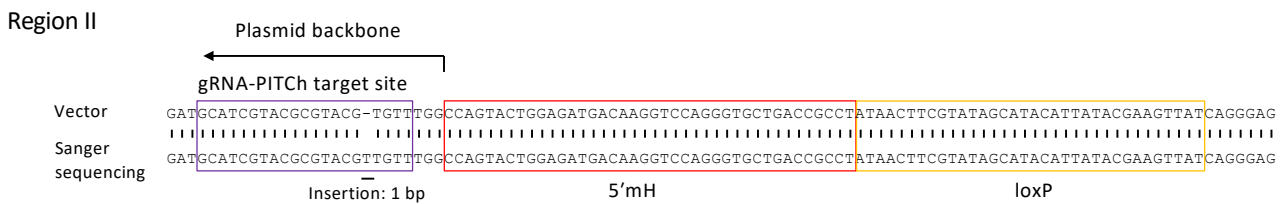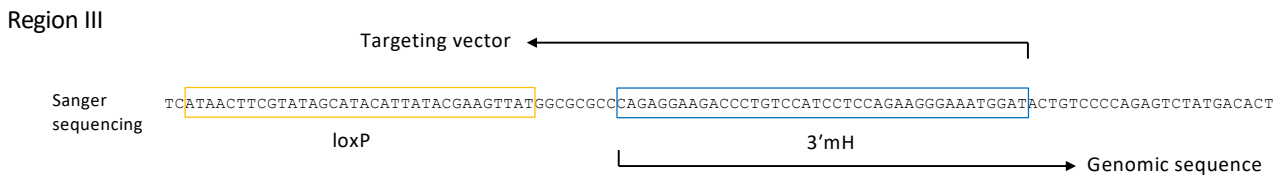

Supplementary Figure 3 (continued)

# Clone 21

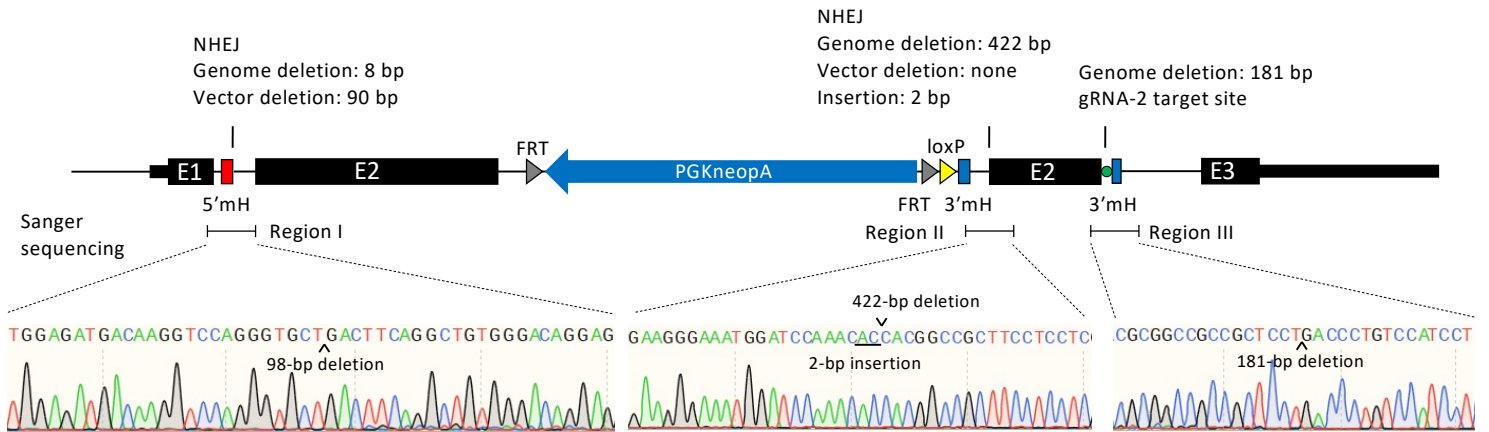

## Region I

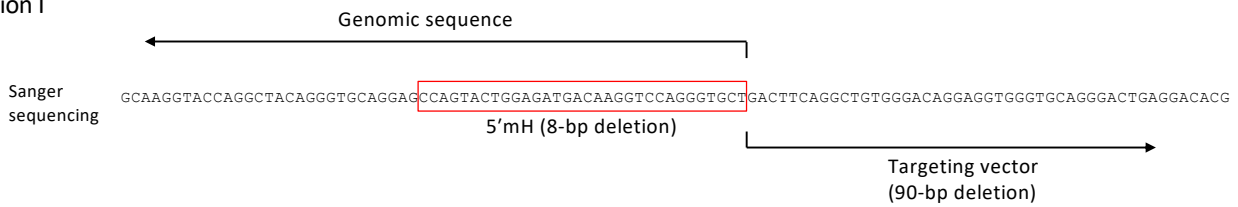

## Region II

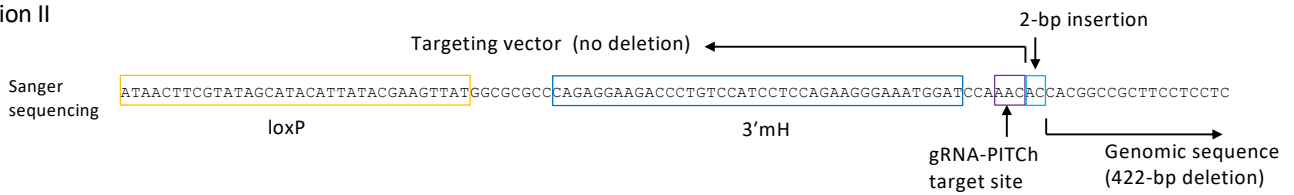

## Region III

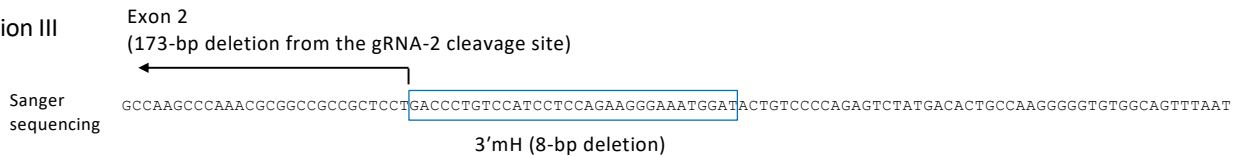

Supplementary Figure 3 (continued)

# Clone 24

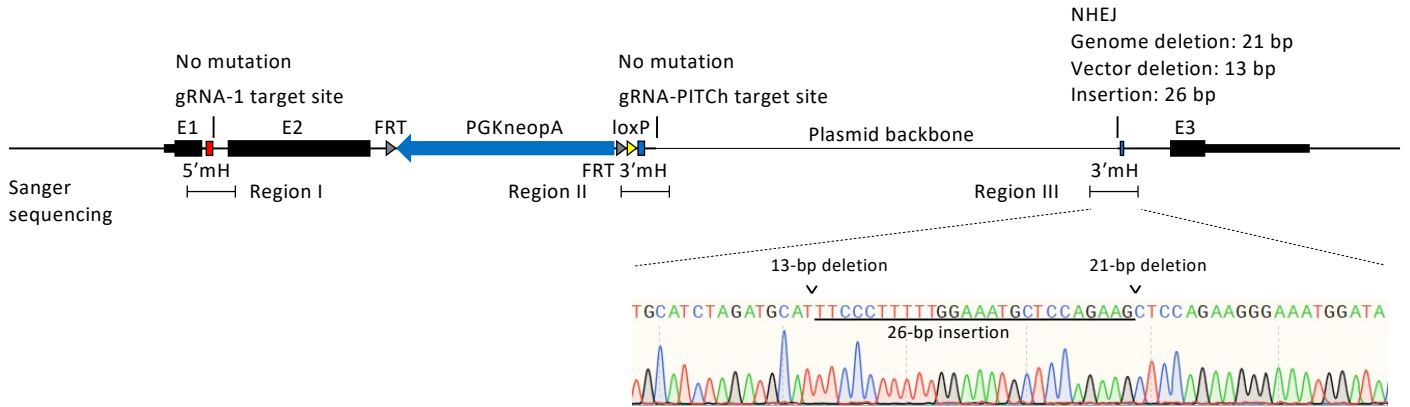

Region I

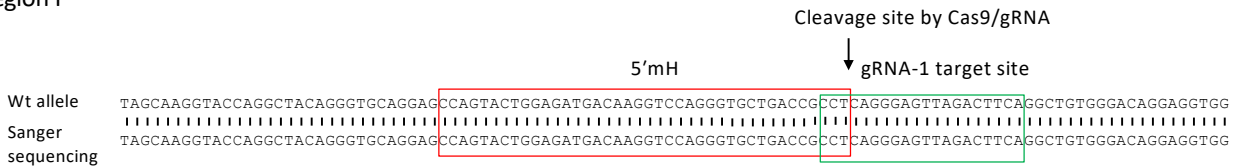

Region II

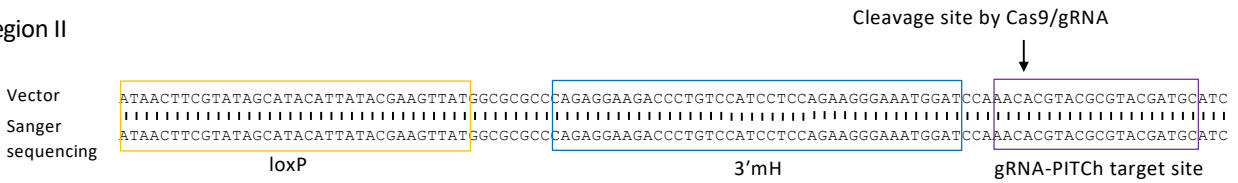

Region III

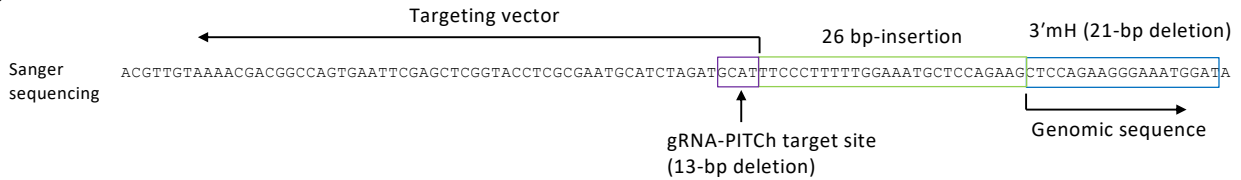

Supplementary Figure 3 (continued)

# Clone 27

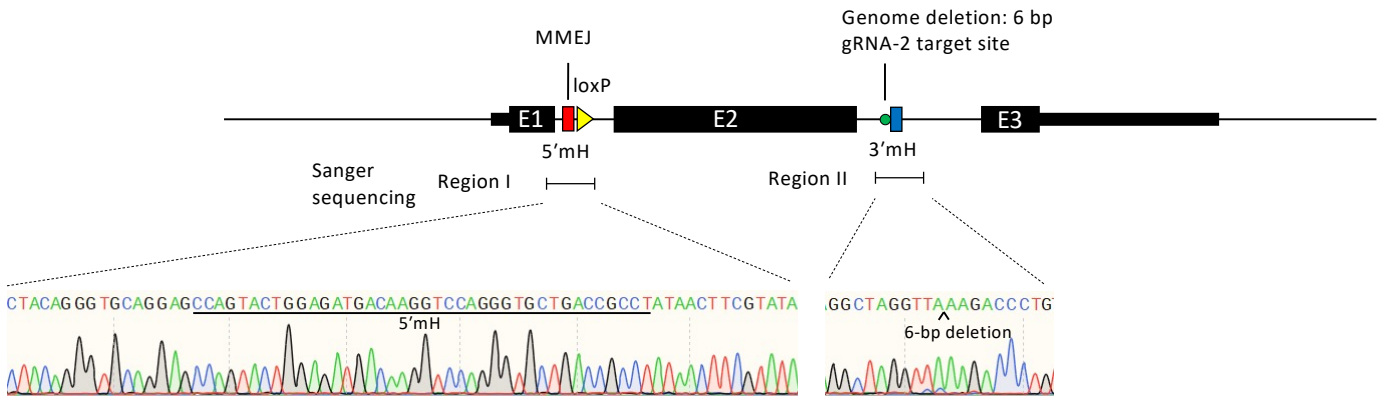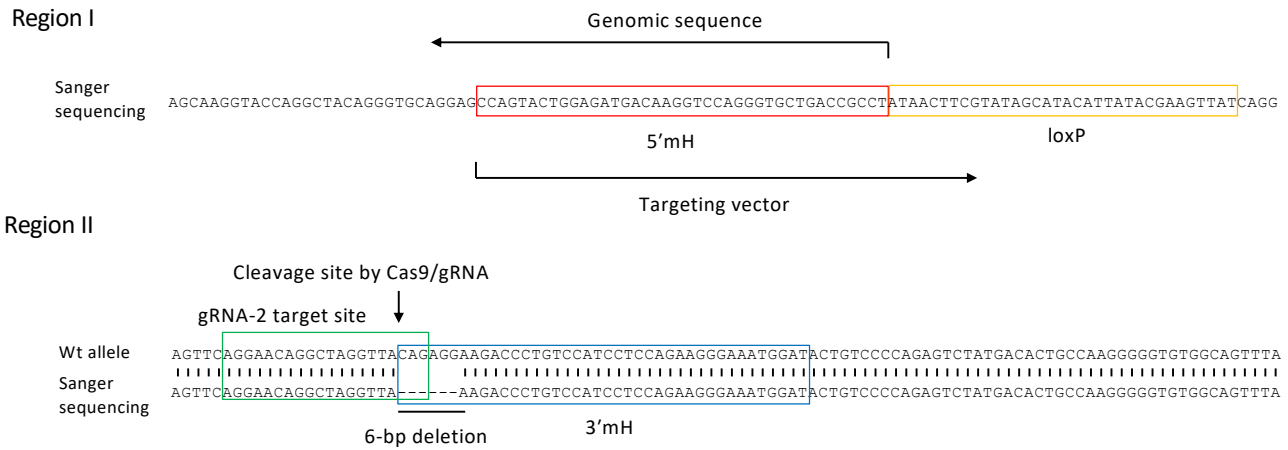

# Clone 29

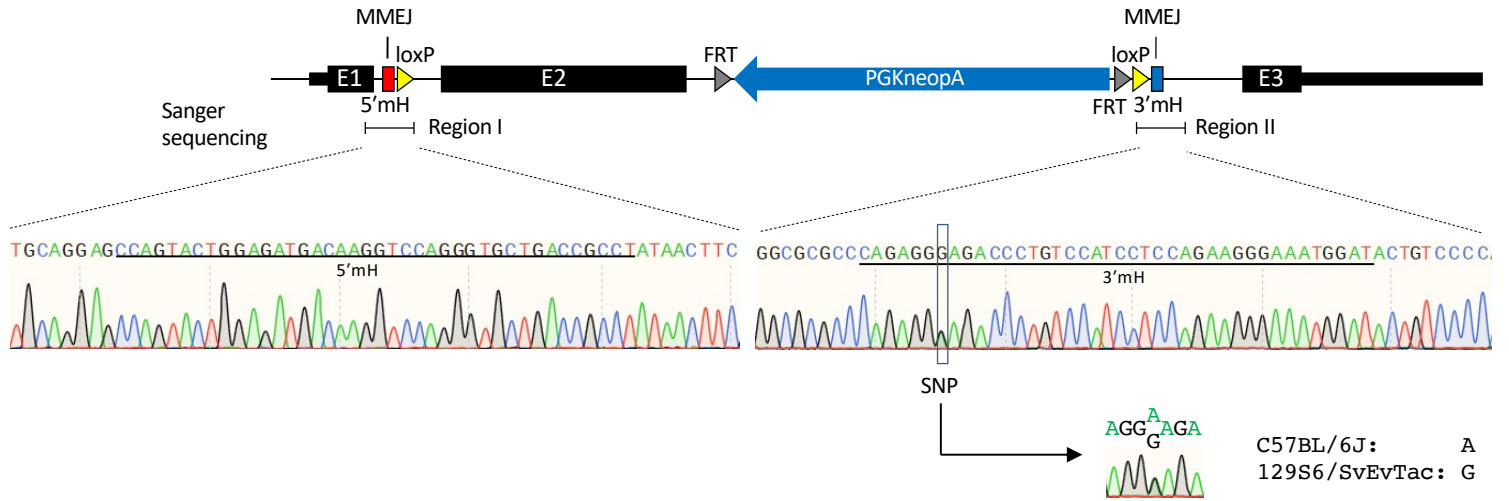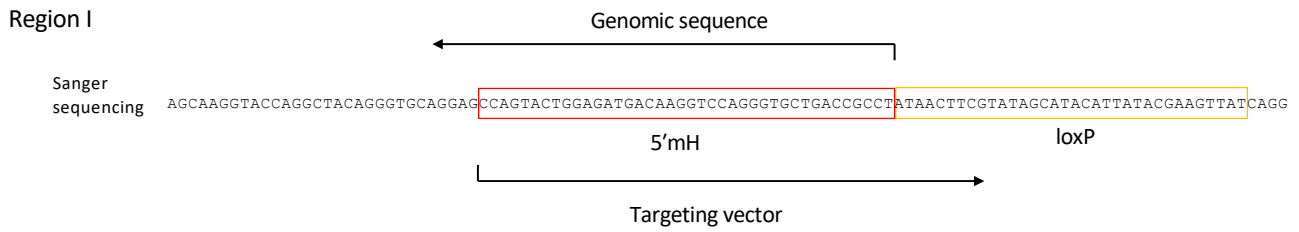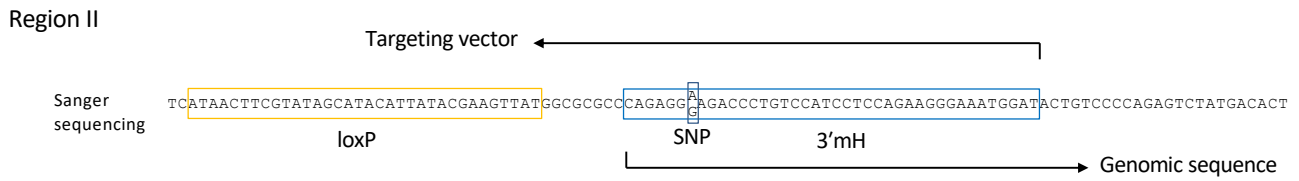

Supplementary Figure 3 (continued)

# Clone 31

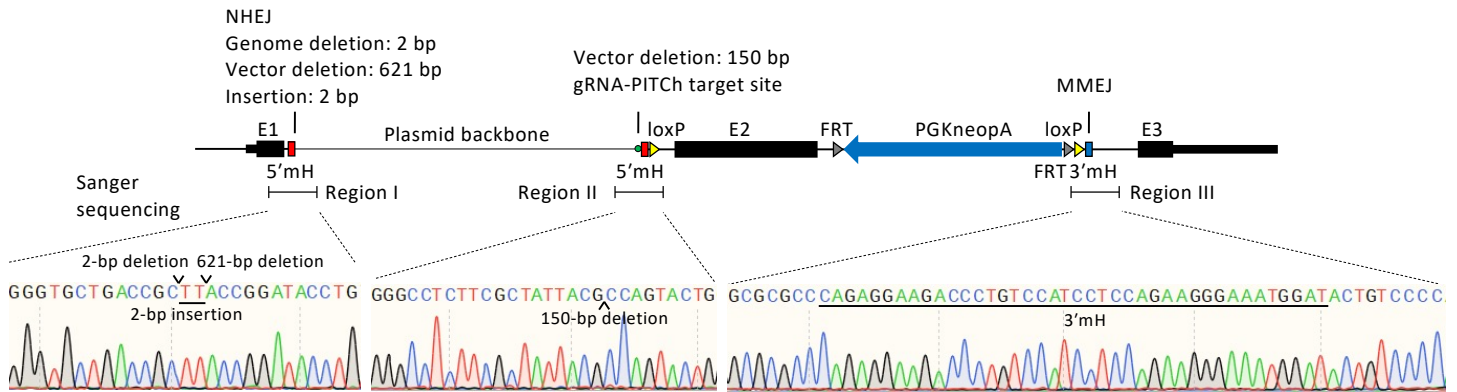

Region I

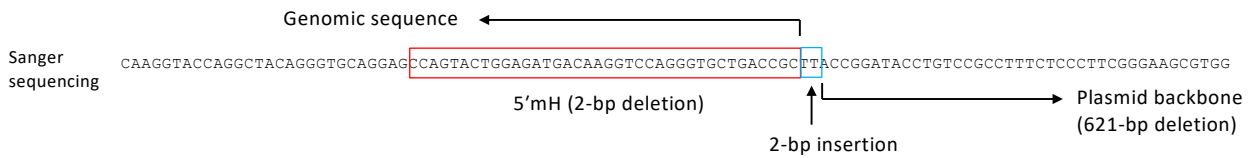

Region II

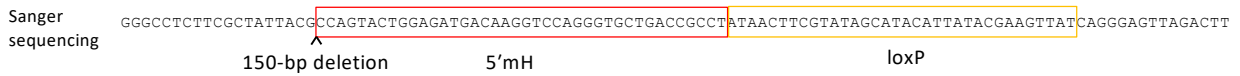

Region III

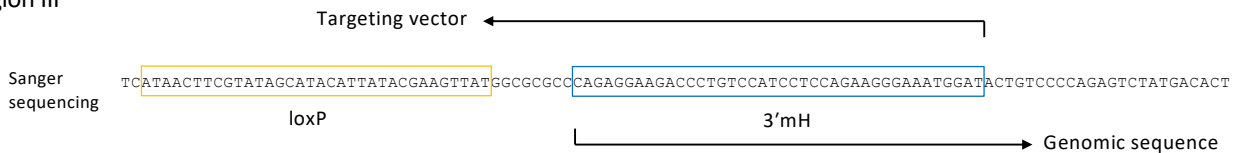

Supplementary Figure 3 (continued)

# Clone 39

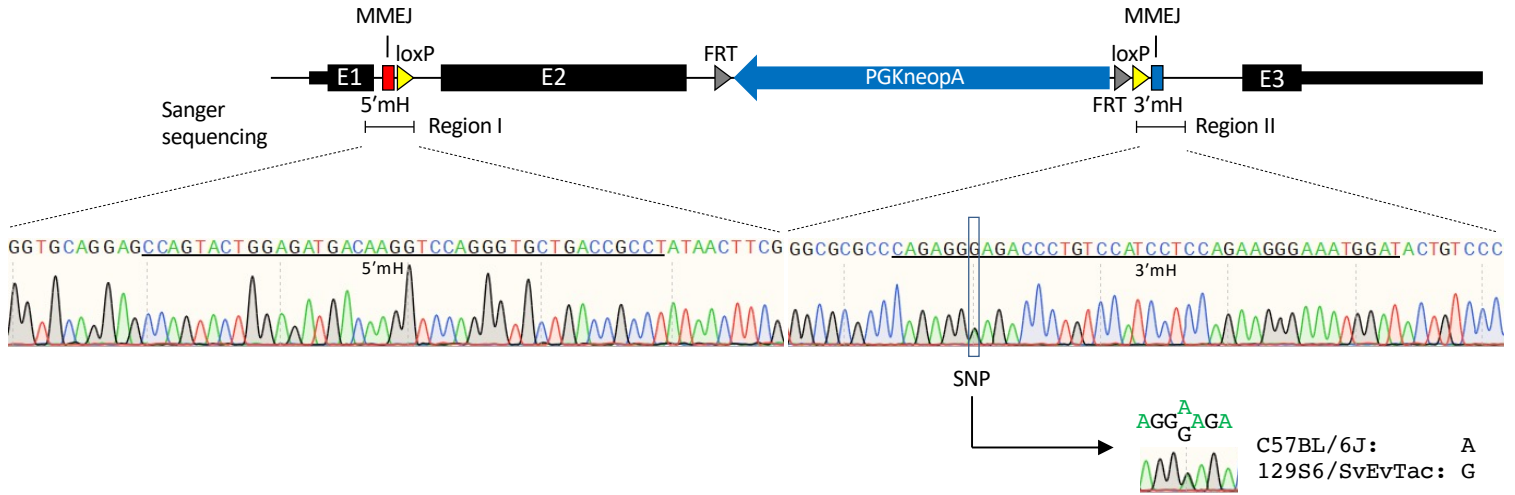

## Region I

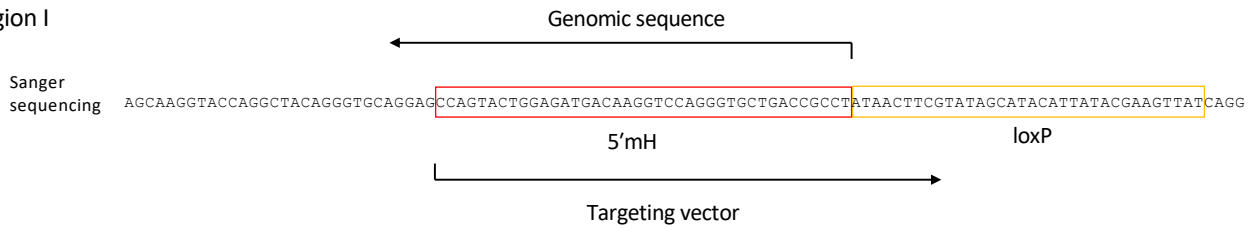

## Region II

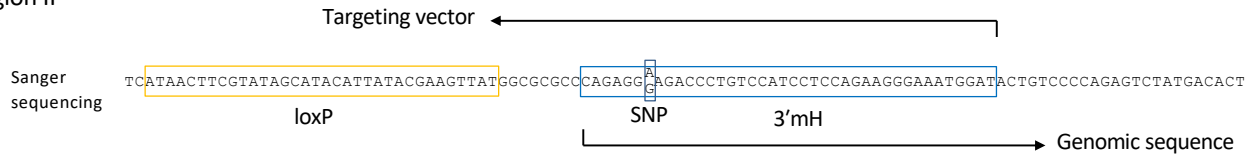



Supplementary Figure 3 (continued)

# Clone 44

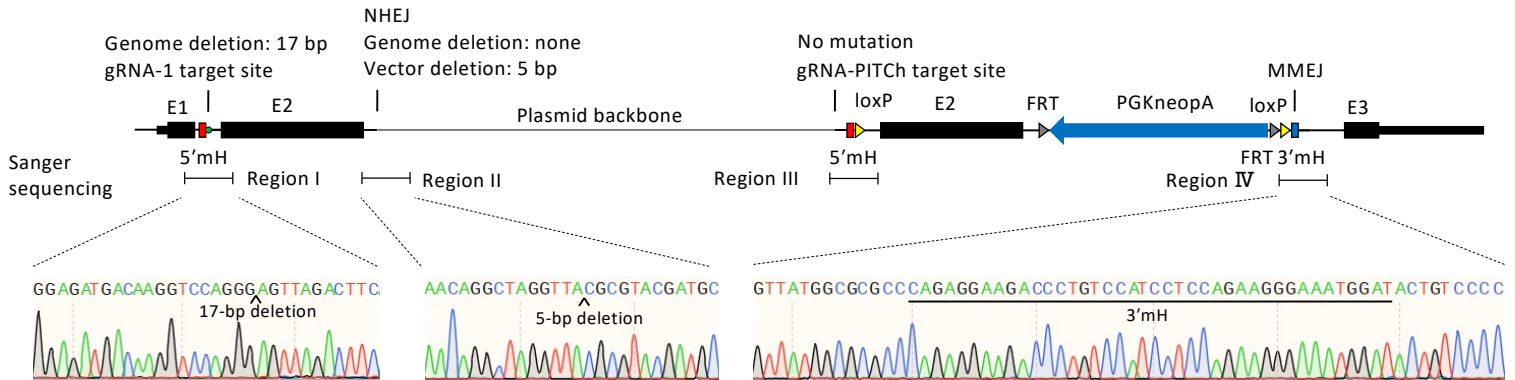

## Region I

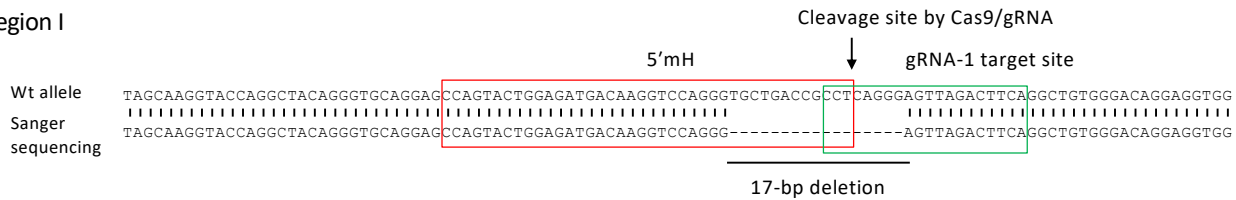

## Region II

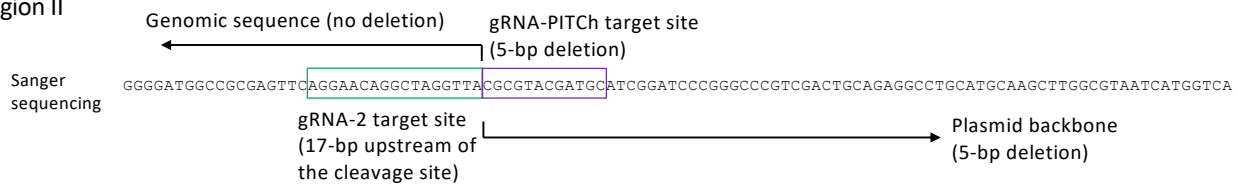

## Region III

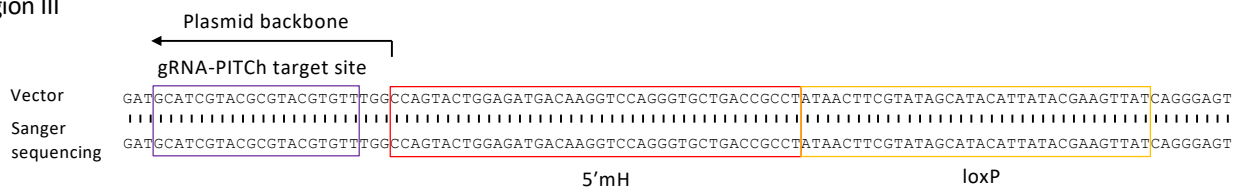

## Region IV

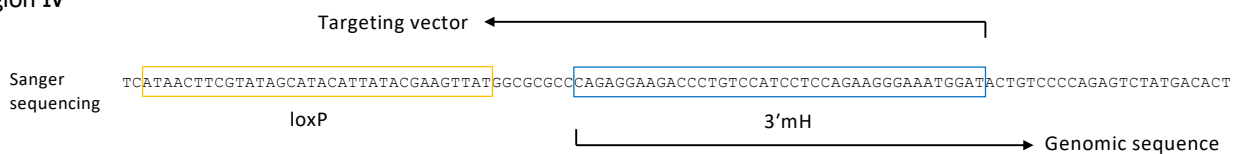

Supplementary Figure 3 (continued)

# Clone 45

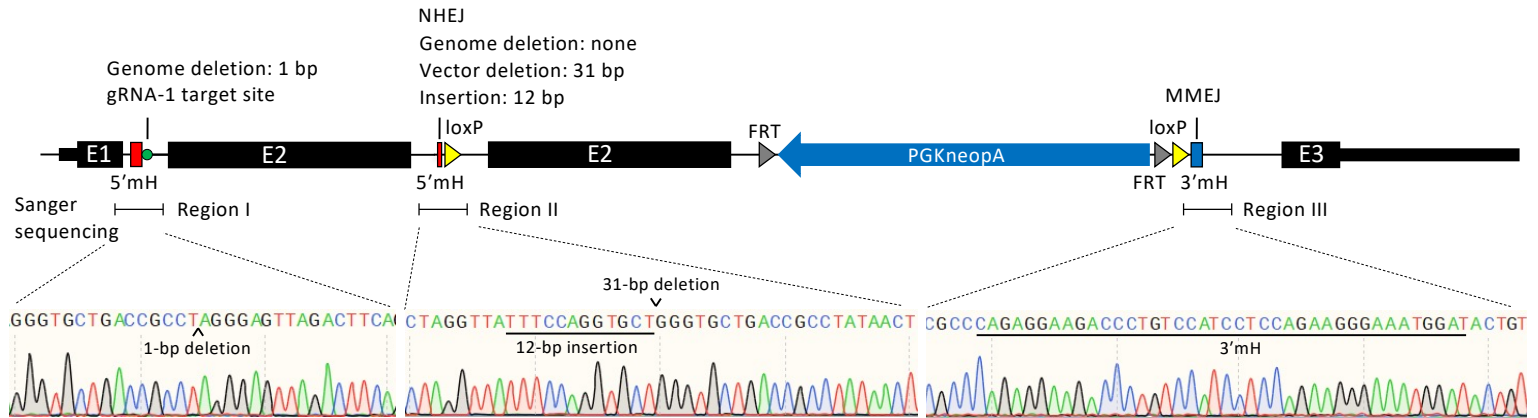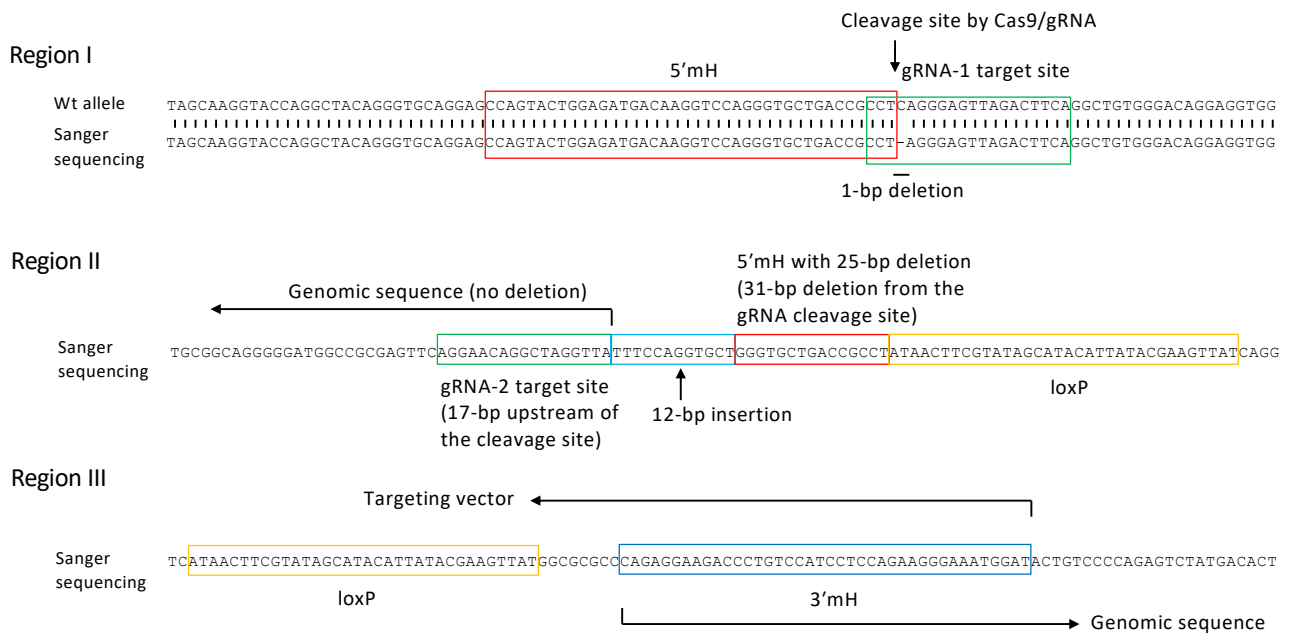

Supplementary Figure 4. The original gel images of Figure 2B.

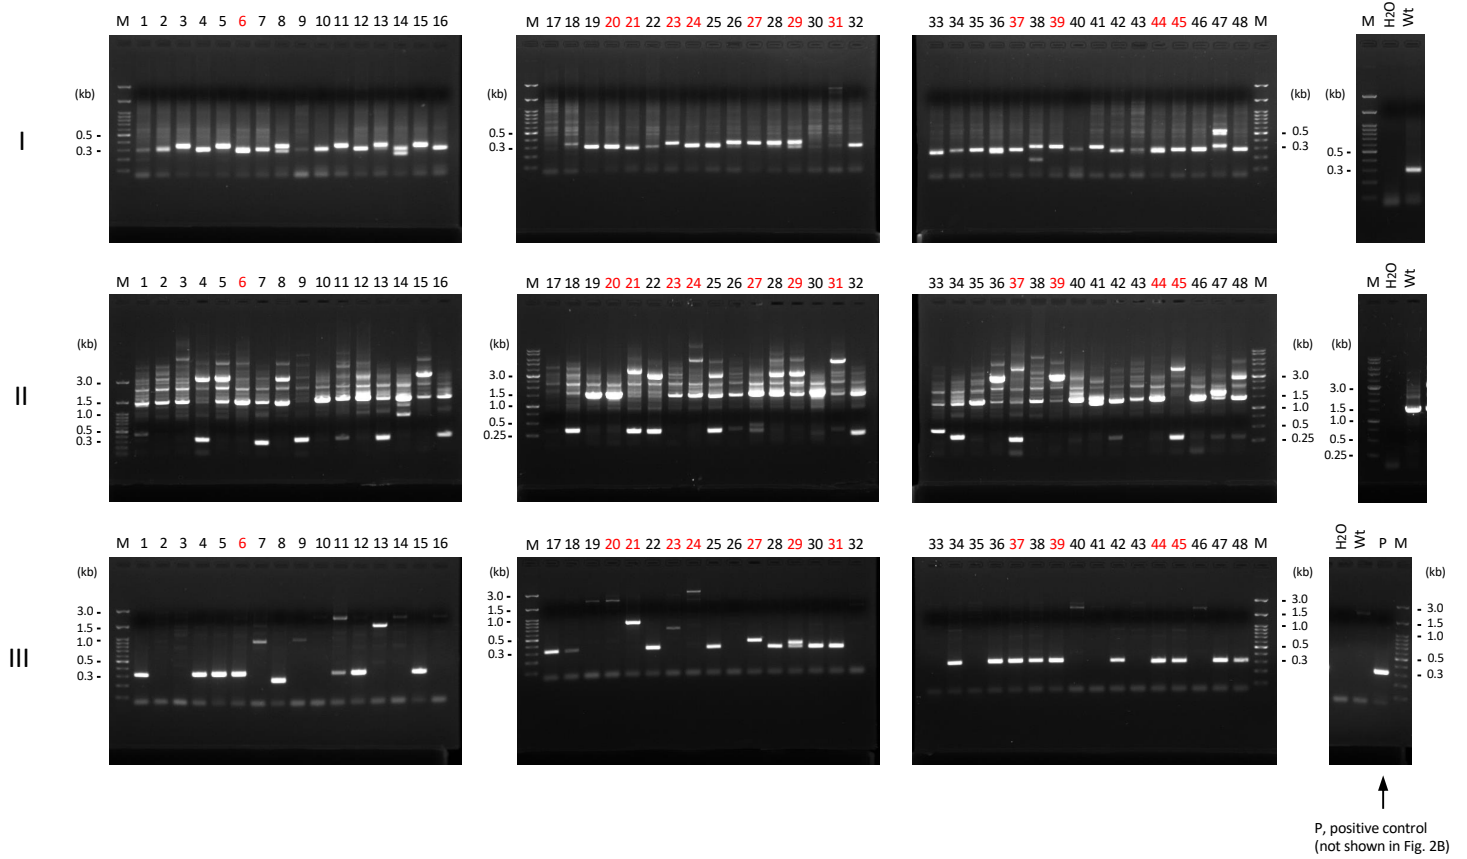

Supplementary Figure 5. The original gel images of Figure 2C.

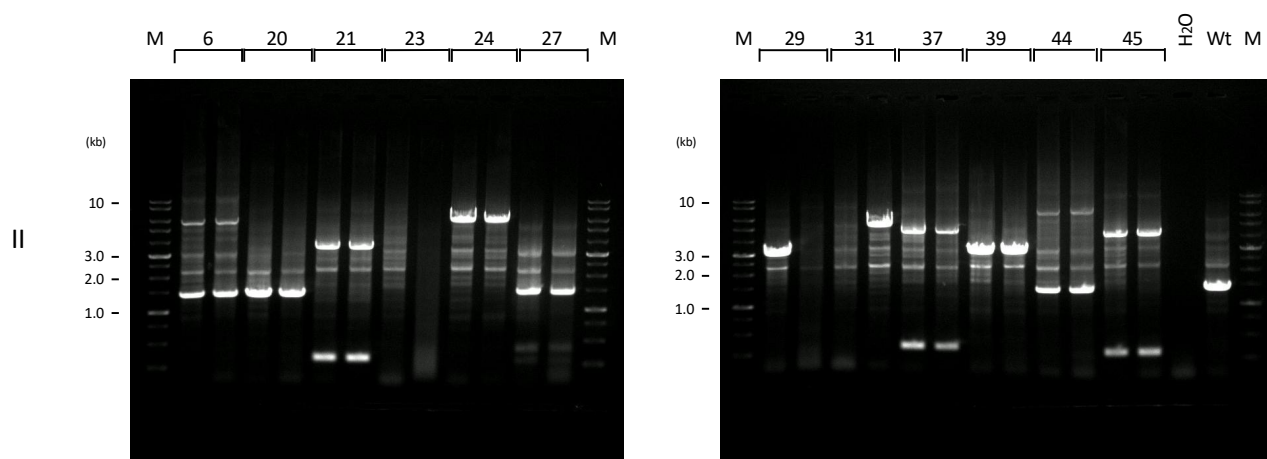

Supplementary Figure 6. The original gel image of Figure 5B.

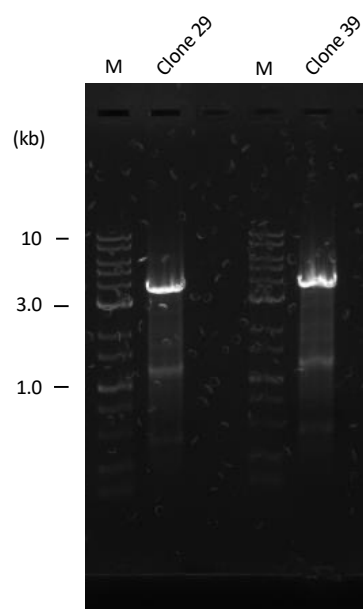

Supplementary Figure 7. The original gel images of Figure 6B.

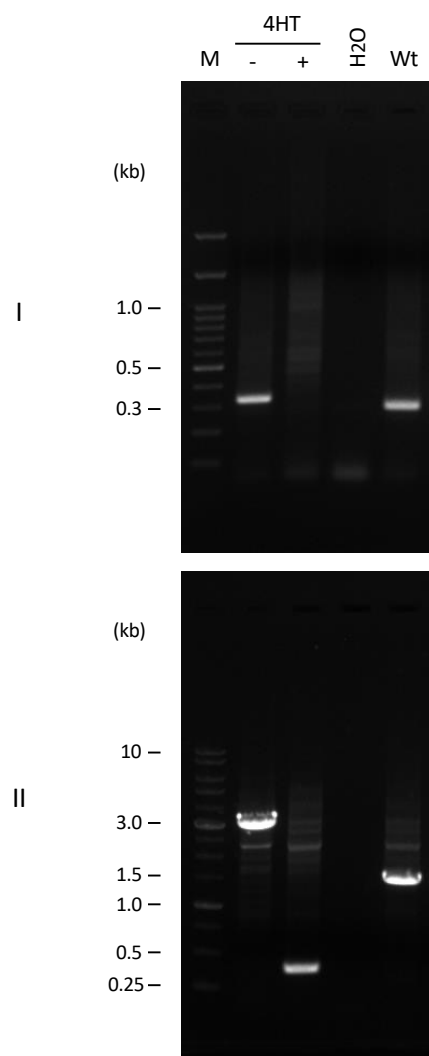

**Supplementary Table 1. Sequences of the oligonucleotides used in this study.**

---

Construction of the Cas9/gRNA vector

pX330-PITCh

gPITCH-F2 caccGCATCGTACGCGTACGTGTT

gPITCH-R2 aaacAACACGTACGCGTACGATGC

pX330-gRNA-1

gKlf2-4-F caccgTGAAGTCTAACTCCCTGAGG

gKlf2-4-R aaacCCTCAGGGAGTTAGACTTCac

pX330-gRNA-2

gKlf2-7-F caccgAGGAACAGGCTAGGTTACAG

gKlf2-7-R aaacCTGTAACCTAGCCTGTTTCCTc

Construction of the targeting vector

Klf2-5HR-F1 ACAAAAAGCTGGAGCTCCACGTAGCCAAAGGGGCCTTGAACCTAATG

Klf2-5HR-R1 CGTATAATGTATGCTATACGAAGTTATAGGCGGTCAGCACCCCTGGACCTT

Klf2-5HR-F2 CGTATAGCATAACATTATACGAAGTTATCAGGGAGTTAGACTTCAGGCTGT

Klf2-5HR-R2 GTGGAGTTCTAGAGCGGCCGCGATATCTAACCTAGCCTGTTTCCTGAACTC

Detection of upstream recombination (primer I, Fig. 2, 6)

Klf2-5mH-scr1 GCTCAGCGAGCCTATCTTGCCGTCCTTT

Klf2-loxP-F1 CCAAAGTCTAACAACTAGGCCCTCAAG

Detection of the full-length insertion sequence (primer II, Fig. 2, 6)

Klf2-5mH-scr1 GCTCAGCGAGCCTATCTTGCCGTCCTTT

Klf2-3mH-scr2 CCAGCCCTCCACAGCTTCTTAATTATGTC

Detection of downstream recombination (primer III, Fig. 2)

PGK-R1 CGGGGCTGCTAAAAGCGCATGCTCCAGACTG

Klf2-3mH-scr2 CCAGCCCTCCACAGCTTCTTAATTATGTC

Detection of SNPs (Fig. 5)

Klf2-SNP-5mH-F1 CAAGGTAGCTTAAACAAAGATTTTCACAGAG

Klf2-SNP-3mH-R1 TGCATCAGAGAGGAATGACATTGAGC
